# Supplementary material for: Energy limitation of cyanophage development: implications for marine carbon cycling
Source: PubMed Central journal article supplement (PMC5931967; doi:10.1038/s41396-017-0043-3), 2018-01-29

**(a)****Motif 1**

E-value: 1.8e-180

Length: 38

Frequency: 26/29

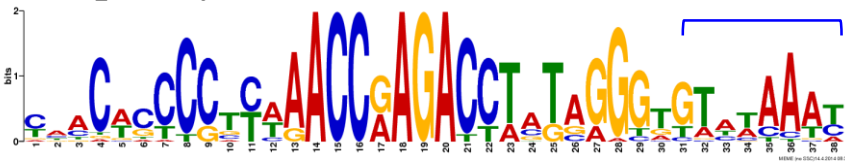**Motif 4**

E-value: 1.3e-72

Length: 22

Frequency: 20/29

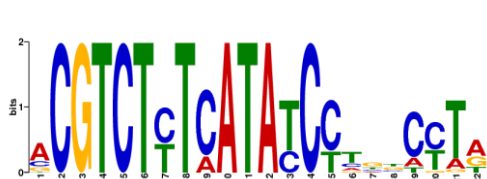**Motif 2**

E-value: 3.0e-118

Length: 31

Frequency: 20/29

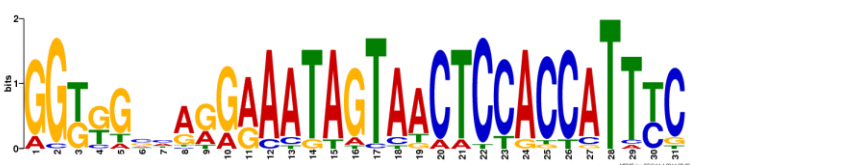**Motif 5**

E-value: 8.7e-62

Length: 22

Frequency: 20/29

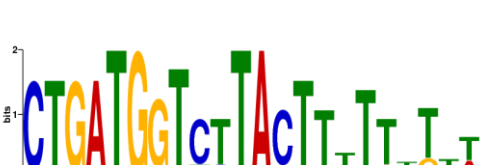**Motif 3**

E-value: 2.7e-101

Length: 31

Frequency: 20/29

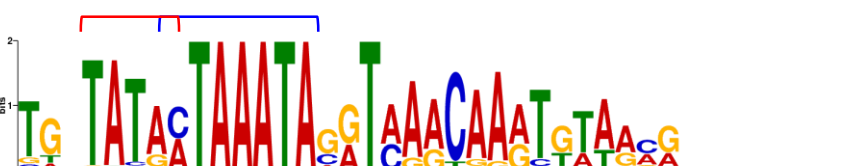**Motif 6**

E-value: 2.7e-029

Length: 31

Frequency: 20/29

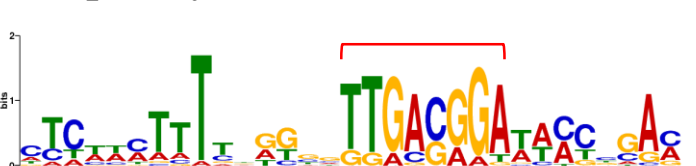**(b)**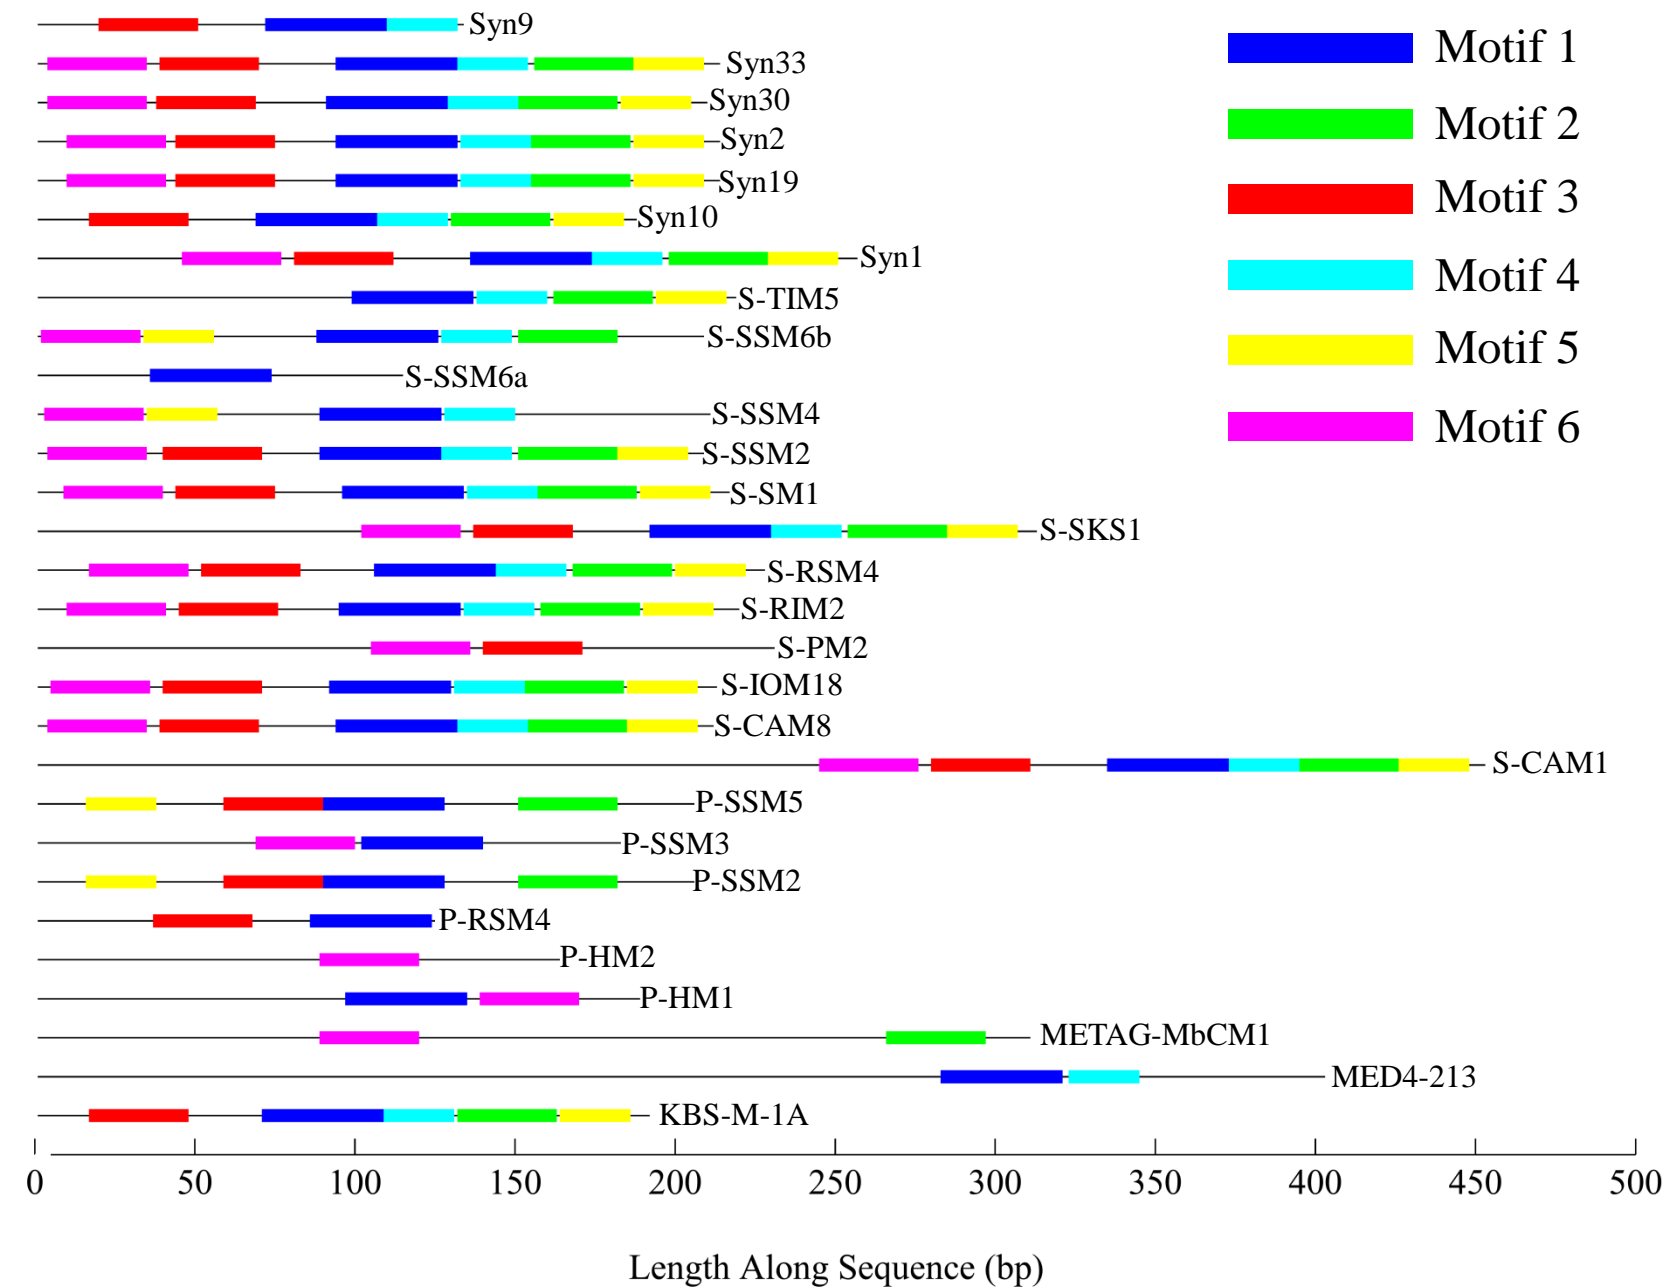

Supplement: 41396_2017_43_MOESM2_ESM.pdf [file 41396_2017_43_MOESM2_ESM.pdf]
